# Supplementary material for: Functional characterization of a new ORF βV1 encoded by radish leaf curl betasatellite
Source: Frontiers journal article supplement (doi:10.3389/fpls.2022.972386), 2022-09-20
Supplement: Data_Sheet_1.pdf [file Data_Sheet_1.pdf]

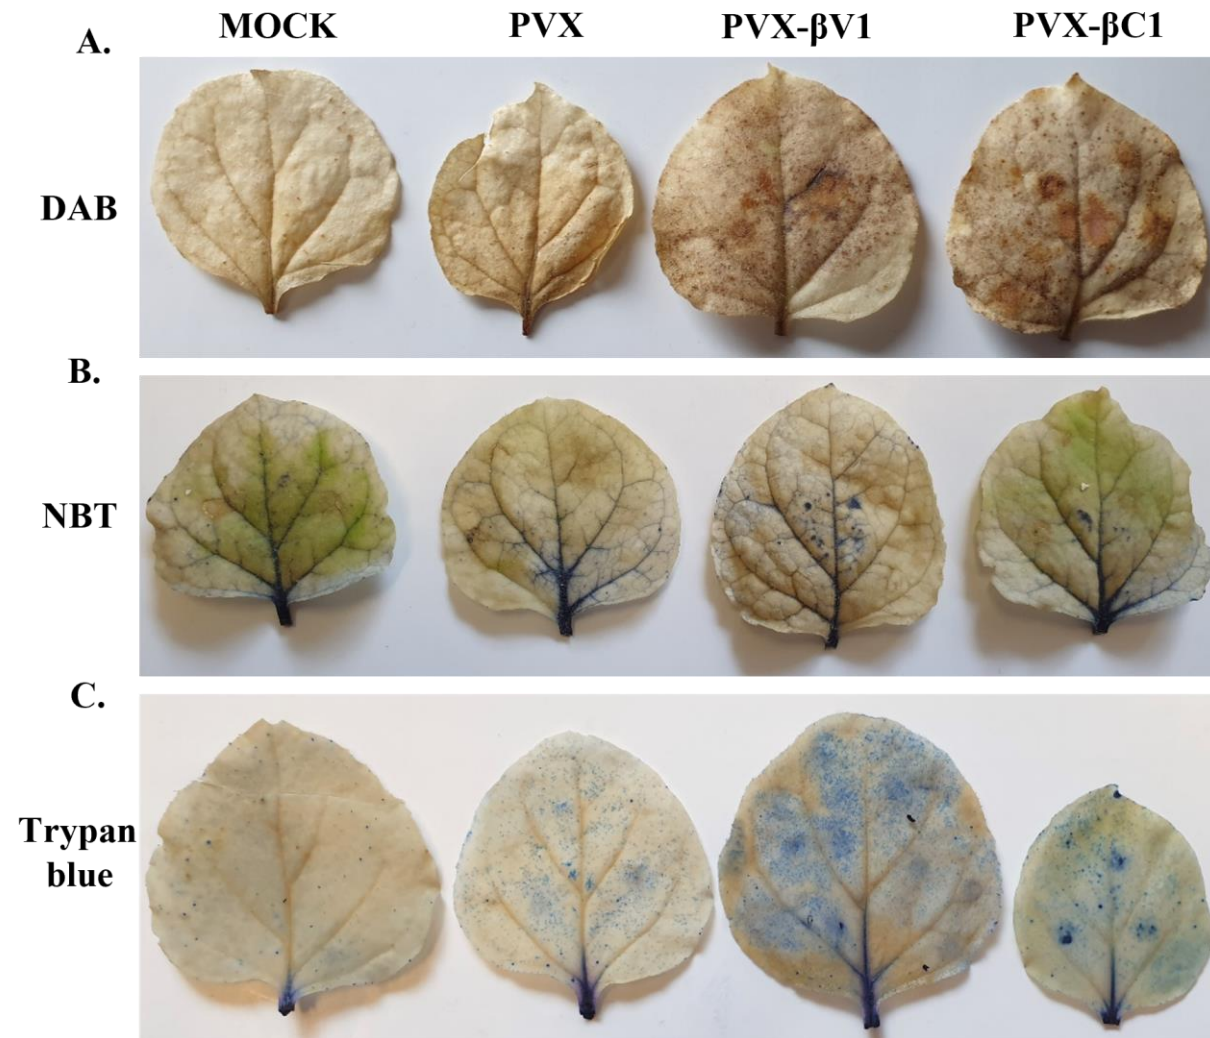

**Supplementary Figure S1.** *Nicotiana benthamiana* leaves, infiltrated with Potato virus X (PVX) and the two PVX-based constructs, were stained with DAB, NBT and trypan blue at five days post infiltration. Leaves infiltrated with PVX- $\beta$ V1 showed the highest accumulation of ROS, free radicals, and increased cell death.

Predicted topologies and predicted  $\Delta G$  values:

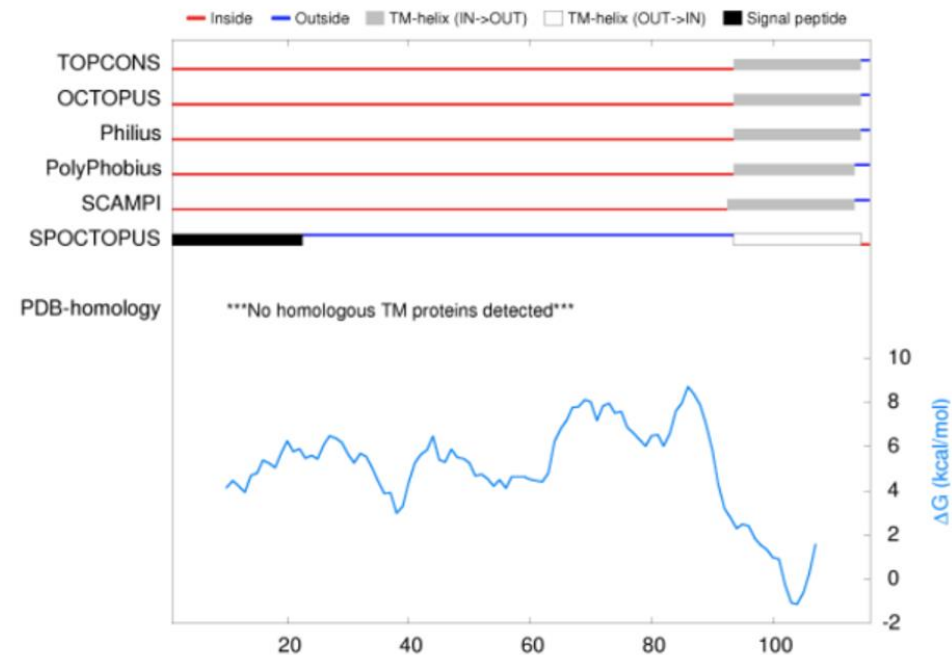

Predicted signal peptide and TM-helix positions (position starting from 1):

|              |                                          |                    |
|--------------|------------------------------------------|--------------------|
| TOPCONS      | <b>TM1: 94-114</b>                       |                    |
| OCTOPUS      | <b>TM1: 94-114</b>                       |                    |
| Philius      | <b>TM1: 94-114</b>                       |                    |
| PolyPhobius  | <b>TM1: 94-113</b>                       |                    |
| SCAMPI       | <b>TM1: 93-113</b>                       |                    |
| SPOCTOPUS    | <b>SP: 1-23,</b>                         | <b>TM1: 94-114</b> |
| PDB-homology | ***No homologous TM proteins detected*** |                    |

**Supplementary Figure S2.** Prediction of the topology of  $\beta V1$  protein. Transmembrane topology was derived using TOPCONS web server, and the consensus prediction of transmembrane domain by individual sub-methods are represented, and predicted G values are indicated in the graph.
